# Supplementary material for: Tailoring Fano lineshapes using plasmonic nanobars for highly sensitive sensing and directional emission
Source: Royal Society of Chemistry journal article supplement (doi:10.1039/c8cp05779f), 2018-11-23
Supplement: c8cp05779f1.pdf [file c8cp05779f1.pdf]

## Supplementary Information

### Tailoring Fano lineshapes using plasmonic nanobars for highly sensitive sensing and directional emission

Guozhou Li,<sup>a</sup> Hongjin Hu<sup>a</sup> and Lijun Wu<sup>\*a</sup>

<sup>a</sup>Guangdong Provincial Key Laboratory of Nanophotonic Functional Materials and Devices, School of Information and Optoelectronic Science and Engineering, South China Normal University, Guangzhou 510006, China.

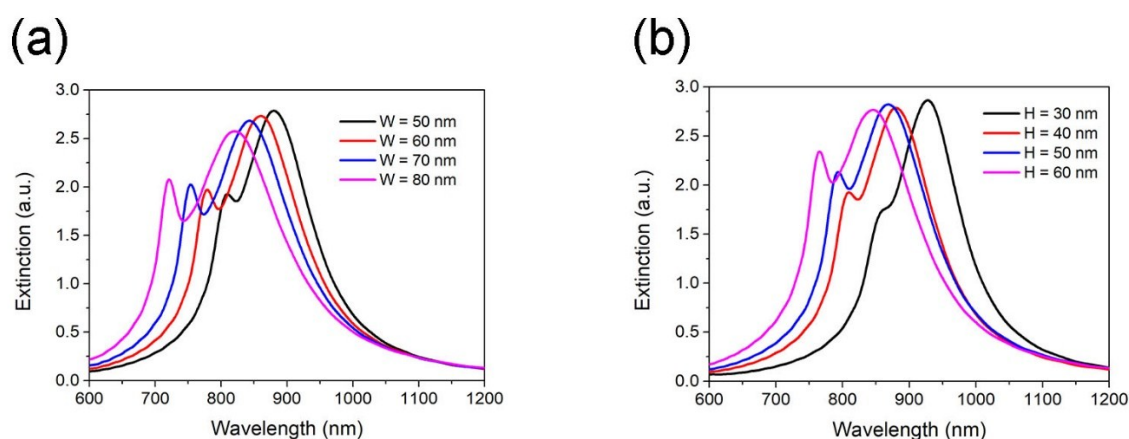

**Figure S1.** Dependence of extinction spectra of the nanocross on the width  $W$  and thickness  $H$ . (a)  $L = 370$  nm and  $H = 40$  nm. (b)  $L = 370$  nm and  $W = 50$  nm.

**Table S1** Comparison of the proposed sensor and other recently published solutions

| Reference | Sensitivity [nm/RIU] | FoM   |
|-----------|----------------------|-------|
| [23]      | 530                  | 5.70  |
| [29]      | 467                  | 6.70  |
| [38]      | 372                  | 6.06  |
| [39]      | 275                  | 6.23  |
| [40]      | 460                  | 7.70  |
| This work | 940                  | 20.90 |
